# Supplementary material for: Amorphous Fe/Co-based tannic acid salts as robust oxygen evolution pre-catalysts
Source: Royal Society of Chemistry journal article supplement (doi:10.1039/d3nj03258b), 2023-01-01
Supplement: d3nj03258b1.pdf [file d3nj03258b1.pdf]

## Supporting Information

### Amorphous Fe/Co-based Tannic Acid Salts as a Robust Oxygen Evolution Pre-catalyst

Wenjuan Zhu,<sup>a</sup> Xueyang Wang,<sup>b</sup> Yi Zhu,<sup>a</sup> Lu Fang,<sup>a</sup> Chengli Yao,<sup>a</sup> Xiaoyang Song,<sup>b</sup> Hu Chen,<sup>a</sup> Xi

Wang,<sup>a</sup> Guoxing Zhu<sup>\*b</sup>

<sup>a</sup>School of Chemistry and Pharmaceutial Engineering, Hefei Normal University, Hefei 230601, China.

<sup>b</sup>School of Chemistry and Chemical Engineering, Jiangsu University, Zhenjiang 212013, China,

Corresponding author, Email : zhuguoxing@ujs.edu.cn

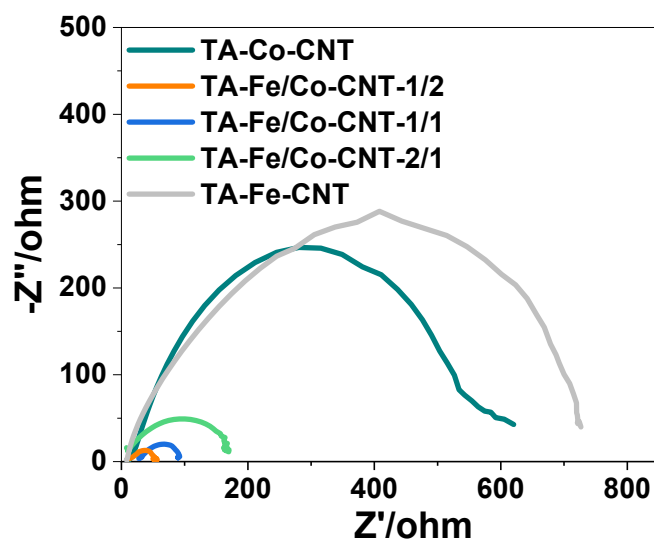

Fig. S1. Nyquist plots of the typical samples measured at 1.58 V (vs RHE).

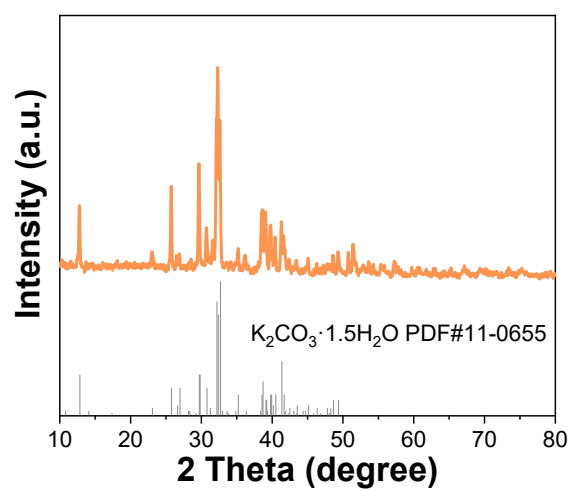

**Fig. S2.** XRD pattern of the used catalyst, which only shows the presence  $K_2CO_3$  that comes from the electrolyte.

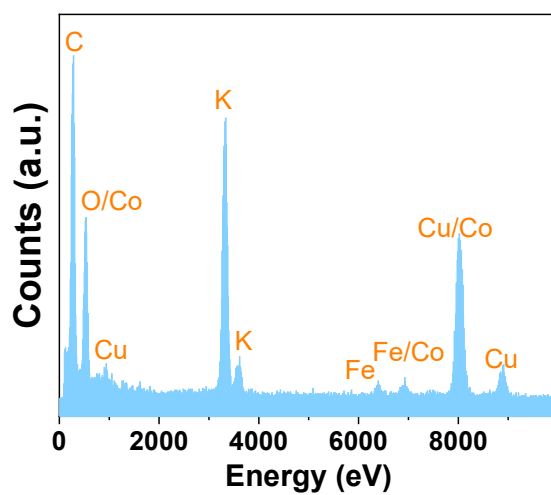

**Fig. S3.** EDS spectrum of the used catalyst, showing the presence of Cu, Fe, Co, C, O, and K elements.

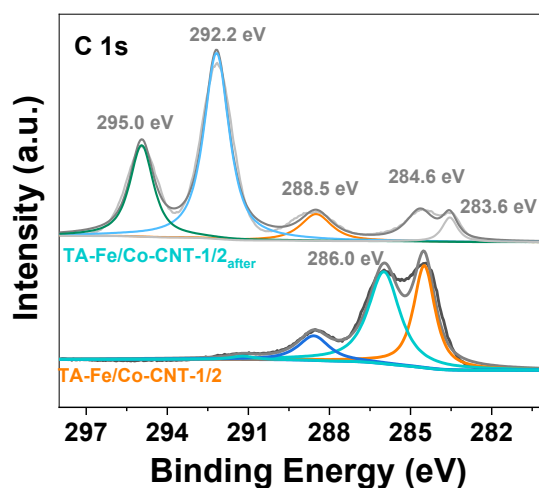

Fig. S4. XPS spectra of C 1s for the TA-Fe/Co-CNT-1/2 and TA-Fe/Co-CNT-1/2<sub>after</sub> products.

Table S1. Catalytic activity comparison of the catalysts.

| Catalysts                                                               | Overpotential for<br>10 or 50 mA cm <sup>-2</sup><br>(mV) | Mass activity at<br>overpotential of<br>350 mV (A g <sup>-1</sup> ) | TOF values at<br>overpotential<br>of 350 mV (s <sup>-1</sup> ) | Refs.     |
|-------------------------------------------------------------------------|-----------------------------------------------------------|---------------------------------------------------------------------|----------------------------------------------------------------|-----------|
| (NiFeCoMn) <sub>3</sub> S <sub>4</sub>                                  | 289/361                                                   | 197.6                                                               | 0.085                                                          | 1         |
| Fe <sub>0.5</sub> Co-P                                                  | 260/360                                                   | 90                                                                  | 0.068                                                          | 2         |
| F-Ni <sub>3</sub> S <sub>2</sub>                                        | 239/-                                                     | -                                                                   | 0.021                                                          | 3         |
| Cu <sub>3</sub> Mo <sub>2</sub> O <sub>9</sub> /NF                      | -/325                                                     | -                                                                   | 0.027                                                          | 4         |
| FeCoNiP                                                                 | 200/250                                                   | -                                                                   | 0.94                                                           | 5         |
| S, S'-CNT                                                               | 350/425                                                   | 45                                                                  | 1.67 × 10 <sup>-5</sup>                                        | 6         |
| Pd <sub>180</sub>                                                       | 240/360                                                   | 560                                                                 | 0.2                                                            | 7         |
| CuCo <sub>2</sub> S <sub>4</sub>                                        | 310/-                                                     | 26.9                                                                | 0.269                                                          | 8         |
| FeS <sub>x</sub> @Co <sub>3</sub> S <sub>4</sub>                        | 300/350                                                   | -                                                                   | 0.9                                                            | 9         |
| Co <sub>0.75</sub> Fe <sub>0.25</sub> @COF                              | 331/420                                                   | -                                                                   | 0.238                                                          | 10        |
| LaSr <sub>3</sub> Co <sub>1.5</sub> Fe <sub>1.5</sub> O <sub>10-δ</sub> | 388/510                                                   | 15.7                                                                | -                                                              | 11        |
| FeCo <sub>2</sub> -NC                                                   | 356/440                                                   | -                                                                   | 0.02                                                           | 12        |
| Fe-LiCoO <sub>2</sub>                                                   | 343/404                                                   | 89                                                                  | -                                                              | 13        |
| TA-Fe/Co-CNT                                                            | 315/370                                                   | 114                                                                 | 0.949                                                          | This work |

## References

1. L. Wu, X. P. Shen, Z. Y. Ji, J. R. Yuan, S. K. Yang, G. X. Zhu, L. Z. Chen, L. R. Kong, *Adv. Funct. Mater.*, 2023, 33, 2208170.
2. Y. Wang, M. S. Xie, F. F. Dai, J. Liu, L. B. Zhang, R. Z. Zhang, Z. Zhang, W. P. Hu, *J. Colloid Interface Sci.*, 2022, 615, 725-731.
3. Q. C. Xu, M. S. Chu, M. M. Liu, J. H. Zhang, H. Jiang, C. Z. Li, *Chem. Eng. J.*, 2021, 411, 128488.
4. Y. Gou, L. Yang, Z. A. Liu, A. M. Asiri, J. M. Hu, X. P. Sun, *Inorg. Chem.*, 2018, 57, 1220-1225.
5. J. Y. Xu, J. J. Li, D. H. Xiong, B.S. Zhang, Y. F. Liu, K. S. Wu, I. Amorim, W. Li, L. F. Liu, *Chem. Sci.*, 2018, 9, 3470-3476.
6. A. M. El-Sawy, I. M. Mosa, D. Su, C. J. Guild, S. Khalid, R. Joesten, J. F. Rusling, S. L. Suib, *Adv. Energy Mater.*, 2016, 6, 1501966.
7. K. S. Joya, M. A. Ehsan, N. Babar, Manzar Sohail, Z. H. Yamani, *J. Mater. Chem. A*, 2019, 7, 9137-9144.
8. M. Chauhan, K. P. Reddy, C. S. Gopinath, S. Deka, *ACS Catal.*, 2017, 7, 5871-5879.
9. Y. X. Qi, T. T. Li, Y. J. Hu, J. H. Xiang, W. Q. Shao, W. H. Chen, X. Q. Mu, S. L. Liu, C. Y. Chen, M. Yu, S. C. Mu, *Chem. Res. Chinese Universities*, 2022, 38, 1282-1286.
10. X. Liu, L. J. Feng, Y. P. Li, T. Xia, Z. Y. Sui, Q. Chen, *Molecules*, 2022, 27, 5193.
11. S. B. Liu, H. Luo, Y. H. Li, Q. X. Liu, J. L. Luo, *Nano Energy*, 2017, 40, 1152-121.
12. Y. Lei, R. X. Huang, H. M. Xie, D. D. Zhang, X. Y. Liu, Y. J. Si, N. Li, *J. Alloys Compd.*, 2021, 853, 157070.
13. J. Li, G. S. Li, J. H. Wang, C. L. Xue, Y. L. Zhang, X. F. Wu, L. S. Meng, L. P. Li, *Eur. J. Inorg. Chem.*, 2019, 19, 2448-2454.
